# Supplementary material for: Super Carbonate Apatite-miR-497a-5p Complex Is a Promising Therapeutic Option against Inflammatory Bowel Disease
Source: Pharmaceuticals (Basel). 2023 Apr 19;16(4):618. doi: 10.3390/ph16040618 (PMC10146939; doi:10.3390/ph16040618)
Supplement: Supplementary file 1 [file pharmaceuticals-16-00618-s001.zip › File S1.Summary of statistics.xlsx]

## Sheet: Reporter assay
Reporter assay round1
	compared to miR-NC
	miRNA	125a-5p	148a-3p	148b-3p	152-3p	15a-5p	16-5p	497a-5p	186-5p	195a-5p	196a-5p	196b-5p	19a-3p	19b-3p
F test	P value	0.339008	0.0696267	0.342448	0.0754898	0.0255035	0.0255035	0.0282242	0.122658	0.00341632	0.26366	0.239885	0.152034	0.0147889
T test	T value	-2.25411	0.295703	-5.74928	4.54082	-1.57242	4.54082	-4.95541	-6.53302	-3.19463	4.96184	1.44165	-0.659985	7.218
	T border	2.13185	2.13185	2.13185	2.13185	2.13185	2.13185	2.13185	2.13185	2.13185	2.13185	2.13185	2.13185	2.13185
	P value	0.0436236	0.391086	0.00522652	0.00524528	0.0954789	0.00524528	0.00386567	0.00141808	0.0165349	0.003848	0.111426	0.272665	0.000976851
P TGF-vs P TGF+		1			NC TGF-vs NC TGF+		1			P TGF-vs P TGF+		2			NC TGF-vs NC TGF+		2
F test	P value	0.15333			F test	P value	0.00355127			F test	P value	0.171472			F test	P value	0.0338632
T test	T value	-7.56141			T test	T value	-6.82694			T test	T value	-6.24927			T test	T value	-6.26899
	T border	2.13185				T border	2.13185				T border	2.91999				T border	2.13185
	P value	0.000819774				P value	0.00120369				P value	0.0123313				P value	0.00165208
Reporter assay roud2
compared to miR-NC
	miRNA	miR-125a	miR-152	miR-497a	miR-195a	miR-148b	miR-16	miR-186
F test	P value	0.407441	0.144268	0.142139	0.260136	0.27431	0.368309	0.349133
T test	T value	1.25367	0.276733	-3.18836	-6.2459	2.21196	0.427611	-6.1175
	T border	2.13185	2.13185	2.13185	2.13185	2.13185	2.13185	2.13185
	P value	0.139118	0.397848	0.0166341	0.00167472	0.091426	0.345475	0.00180787
P TGF-vs P TGF+					NC TGF-vs NC TGF+
F test	P value	0.318758			F test	P value	0.0776319
T test	T value	-10.8163			T test	T value	-4.42977
	T border	2.13185				T border	2.13185
	P value	0.000207233				P value	0.00571201

## Sheet: binding assay
binding assay
compared to miR-NC
		miR-497
F test	P value	0.411218
T test	T value	7.82581
	T border	2.13185
	P value	0.000719695

## Sheet: macropharge cytokine
Macropharge cytokine
compared to miR-NC
TNF-α						IL-6						IL-12
		4h	24h	48h				4h	24h	48h				4h	24h	48h
F test	P value	0.143138	0.444484	0.0340622		F test	P value	0.088819	0.00829316	0.279158		F test	P value	0.043483	0.000273621	0.0362528
T test	T value	67.3723	4.92869	2.5089		T test	T value	8.11922	5.27508	188.665		T test	T value	0.00896298	4.30948	8.27752
	T border	2.13185	2.13185	2.13185			T border	2.13185	2.13185	2.13185			T border	2.13185	2.13185	2.13185
	P value	1.45398e-07	0.00394011	0.0330674			P value	0.000625709	0.00309538	2.36743e-09			P value	0.496639	0.00627562	0.000581304

## Sheet: miR497 in vivo
Colon length
ANOVA
P value	7.72581e-05
F border	3.23887
Normal vs DSS				Normal vs NC				Normal vs 497
F test	P value	0.31082		F test	P value	0.517473		F test	P value	0.366378
T test	T value	4.8501		T test	T value	3.38826		T test	T value	-0.795584
	T border	2.20099			T border	2.44691			T border	0.462354
	P value	0.000510679			P value	0.00735356			P value	0.231177
DSS vs NC				DSS vs 497				NC vs 497
F test	P value	0.320001		F test	P value	0.232946		F test	P value	0.392595
T test	T value	0.525052		T test	T value	-5.04316		T test	T value	-4.31851
	T border	2.26216			T border	2.306			T border	2.57058
	P value	0.306117			P value	0.000498851			P value	0.00379063
	T.Test	Bonferroni法
NC VS 497	0.00379063	0.0227438
DSS vs NC	0.306117	1.8367
normal vs DSS	0.000510679	0.00306407
normal vs NC	0.00735356	0.0441214
normal vs 497	0.231177	1.38706
DSS VS 497	0.000498851	0.0029931
Body weight
ANOVA
P value	0.0227794
F border	4.06618
Normal vs DSS				Normal vs NC				Normal vs 497
F test	P value	0.400043		F test	P value	0.195205		F test	P value	0.412343
T test	T value	4.58399		T test	T value	2.90622		T test	T value	4.90018
	T border	4.30265			T border	4.30265			T border	4.30265
	P value	0.0444412			P value	0.100811			P value	0.039213
DSS vs NC				DSS vs 497				NC vs 497
F test	P value	0.139215		F test	P value	0.487253		F test	P value	0.14544
T test	T value	1.17636		T test	T value	-1.65411		T test	T value	-1.68821
	T border	4.30265			T border	4.30265			T border	4.30265
	P value	0.360505			P value	0.239927			P value	0.233427
	T.Test	Bonferroni法
NC VS 497	0.233427	1.40056
DSS vs NC	0.360505	2.16303
normal vs DSS	0.0444412	0.266647
normal vs NC	0.100811	0.604864
normal vs 497	0.039213	0.235278
DSS VS 497	0.239927	1.43956
Histological score
ANOVA
P value	6.07855e-05
F border	3.86255
Normal vs DSS				Normal vs NC				Normal vs 497
F test	P value	0		F test	P value	0		F test	P value	0
T test	T value	-11		T test	T value	-7.50325		T test	T value	-4
	T border	2.77645			T border	2.57058			T border	2.77645
	P value	0.000388171			P value	0.000664914			P value	0.0161301
DSS vs NC				DSS vs 497				NC vs 497
F test	P value	0.277904		F test	P value	0.5		F test	P value	0.277904
T test	T value	-0.923936		T test	T value	4.94975		T test	T value	4.61968
	T border	2.57058			T border	2.77645			T border	2.57058
	P value	0.397917			P value	0.0077626			P value	0.00573706
	T.Test	Bonferroni法
NC VS 497	0.00573706	0.0344224
DSS vs NC	0.397917	2.3875
normal vs DSS	0.000388171	0.00232903
normal vs NC	0.000664914	0.00398949
normal vs 497	0.0161301	0.0967805
DSS VS 497	0.0077626	0.0465756

## Sheet: Macropharge miR marge
Macropharge miR marge
compared to miR-NC
F test	P value	0.0716761
T test	T value	1.34069
	T border	2.07387
	P value	0.193703

## Sheet: miR186 in vivo
Colon length
ANOVA
P value	0.0105775
F border	4.06618
Normal vs DSS				Normal vs 497				Normal vs 186
F test	P value	0.107143		F test	P value	0.0652174		F test	P value	0.0171429
T test	T value	1.88982		T test	T value	-4.12837		T test	T value	-2.64575
	T border	2.77645			T border	2.77645			T border	4.30265
	P value	0.131778			P value	0.0145131			P value	0.118083
DSS vs 497				DSS vs 186				497 vs 186
F test	P value	0.367647		F test	P value	0.126904		F test	P value	0.2
T test	T value	-4.60818		T test	T value	-3.20612		T test	T value	-0.477396
	T border	2.77645			T border	2.77645			T border	2.77645
	P value	0.00498466			P value	0.0327096			P value	0.657995
	T.Test	Bonferroni法
normal VS DSS	0.131778	0.790665
normal vs 497	0.0145131	0.0870785
normal vs 186	0.118083	0.708497
DSS vs 497	0.00498466	0.029908
DSS vs 186	0.0327096	0.196258
497 VS 186	0.657995	3.94797
Body weight
ANOVA
P value	0.376601
F border	3.58743
Normal vs DSS				Normal vs 497				Normal vs 186
F test	P value	0.0428317		F test	P value	0.29856		F test	P value	0.39018
T test	T value	-2.16046		T test	T value	-0.2543		T test	T value	-0.715847
	T border	2.57058			T border	2.57058			T border	2.57058
	P value	0.0831391			P value	0.809391			P value	0.506116
DSS vs 497				DSS vs 186				497 vs 186
F test	P value	0.0916366		F test	P value	0.019627		F test	P value	0.18427
T test	T value	2.38859		T test	T value	0.65046		T test	T value	-0.65046
	T border	2.44691			T border	2.44691			T border	2.44691
	P value	0.05413			P value	0.539489			P value	0.539489
	T.Test	Bonferroni法
normal VS DSS	0.0831391	0.498835
normal vs 497	0.809391	4.85634
normal vs 186	0.506116	3.03669
DSS vs 497	0.05413	0.32478
DSS vs 186	0.539489	3.23693
497 VS 186	0.539489	3.23693
Histological score
ANOVA
P value	0.000864973
F border	3.58743
Normal vs DSS				Normal vs 497				Normal vs 186
F test	P value	0		F test	P value	0		F test	P value	0
T test	T value	-10.247		T test	T value	-3.08957		T test	T value	-3.08957
	T border	2.57058			T border	2.57058			T border	2.57058
	P value	0.000152057			P value	0.0271726			P value	0.0271726
DSS vs 497				DSS vs 186				497 vs 186
F test	P value	0.214077		F test	P value	0.214077		F test	P value	0.5
T test	T value	4.91354		T test	T value	4.91354		T test	T value	0.5
	T border	2.57058			T border	2.57058			T border	2.77645
	P value	0.0044222			P value	0.0044222			P value	1
	T.Test	Bonferroni法
normal VS DSS	0.000152057	0.00091234
normal vs 497	0.0271726	0.163036
normal vs 186	0.0271726	0.163036
DSS vs 497	0.0044222	0.0265332
DSS vs 186	0.0044222	0.0265332
497 VS 186	1	6
